# Supplementary material
Source: PubMed Central journal article supplement (PMC7062227)
Supplement: ASN.2019090905SupplementaryData.pdf [file ASN.2019090905SupplementaryData.pdf]

**Supplemental Material****A Randomized Trial of Distal Diuretics versus Dietary Sodium Restriction  
for Hypertension in Chronic Kidney Disease**

Dominique M. Bovée, Wesley J. Visser, Igor Middel, Anneke De Mik – van Egmond,  
Rick Greupink, Rosalinde Masereeuw, Frans G.M. Russel,  
A.H. Jan Danser, Robert Zietse, Ewout J. Hoorn

**Table of Contents:**

- **Supplemental Methods**
- **Supplemental Table 1:** Consolidated Standards of Reporting Trials (CONSORT) 2010 checklist of information.
- **Supplemental Table 2:** Effect of sodium restriction and diuretics on day and night systolic blood pressure (SBP), diastolic blood pressure (DBP) and mean arterial pressure (MAP).
- **Supplemental Figure 1:** Consolidated Standards of Reporting Trials (CONSORT) diagram.
- **Supplemental Figure 2:** Effect of sodium ( $\text{Na}^+$ ) restriction and diuretics on creatinine clearance.

## Supplemental Methods

Urinary aldosterone measurements were performed using a commercial assay (Demeditec, Germany). The detection limit and mean coefficient of variation of the within-run and between-run variability of this assay are 1.44 pg/mL, 3.3 % and 8.4 %, respectively.

Moreover, the antibody used in the immunoassay is highly specific for aldosterone. Extremely low cross-reactivities were obtained against other naturally occurring steroids (cortisone, corticosterone, DHEAs, etc.). Urinary renin and angiotensinogen measurements were performed using an in-house developed enzyme-kinetic assay. The detection limit and mean coefficient of variation of the within-run and between-run variability of this assay are 2 pg/mL, 2.9% and 12.6% for renin measurements and 0.12 ng/mL, 4% and 10% for angiotensinogen measurements. Please note that in every enzyme-kinetic assay, we measure a set of standard samples allowing us to determine the within- and between-run variability.

Furthermore, we always include buffer samples to correct for background noise. As an example, when measuring renin in the presence of excess angiotensinogen, the same amount of excess angiotensinogen is incubated with buffer, and the generated amount of angiotensin I is subtracted from the amount of angiotensin I generated in the actual sample. This needs to be taken into account, particularly when measuring samples with low renin levels like urine.<sup>1</sup> In previous studies we have added fixed amounts of (pro)renin and angiotensinogen to urine samples, and found recovery to be >95%.<sup>2,3</sup> This is not surprising, since the levels of degrading enzymes in urine are negligible. Finally, regarding cross-reactivity, it is important to note that the assays rely on the detection of angiotensin I making use of an angiotensin I-directed antibody. Cross-reactivity of this antibody with other angiotensin metabolites is <0.1%.<sup>4</sup> In this regard, the correction for background noise as explained above seems to be of greater importance, since the assay is performed in the presence of angiotensinase inhibitors, not allowing the generation of metabolites other than angiotensin I.

**Supplemental Table 1:** Consolidated Standards of Reporting Trials (CONSORT) 2010

checklist of information.

| Section/Topic                    | Item No | Checklist item                                                                                                                                                                              | Reported on page No |
|----------------------------------|---------|---------------------------------------------------------------------------------------------------------------------------------------------------------------------------------------------|---------------------|
| <b>Title and abstract</b>        |         |                                                                                                                                                                                             |                     |
|                                  | 1a      | Identification as a randomized trial in the title                                                                                                                                           | 1                   |
|                                  | 1b      | Structured summary of trial design, methods, results, and conclusions (for specific guidance see CONSORT for abstracts)                                                                     | 3                   |
| <b>Introduction</b>              |         |                                                                                                                                                                                             |                     |
| Background and objectives        | 2a      | Scientific background and explanation of rationale                                                                                                                                          | 4-5                 |
|                                  | 2b      | Specific objectives or hypotheses                                                                                                                                                           | 5                   |
| <b>Methods</b>                   |         |                                                                                                                                                                                             |                     |
| Trial design                     | 3a      | Description of trial design (such as parallel, factorial) including allocation ratio                                                                                                        | 6-7                 |
|                                  | 3b      | Important changes to methods after trial commencement (such as eligibility criteria), with reasons                                                                                          | NA                  |
| Participants                     | 4a      | Eligibility criteria for participants                                                                                                                                                       | 6                   |
|                                  | 4b      | Settings and locations where the data were collected                                                                                                                                        | 6                   |
| Interventions                    | 5       | The interventions for each group with sufficient details to allow replication, including how and when they were actually administered                                                       | 6-7                 |
| Outcomes                         | 6a      | Completely defined pre-specified primary and secondary outcome measures, including how and when they were assessed                                                                          | 7-8                 |
|                                  | 6b      | Any changes to trial outcomes after the trial commenced, with reasons                                                                                                                       | NA                  |
| Sample size                      | 7a      | How sample size was determined                                                                                                                                                              | 8                   |
|                                  | 7b      | When applicable, explanation of any interim analyses and stopping guidelines                                                                                                                | NA                  |
| Randomization:                   |         |                                                                                                                                                                                             |                     |
| Sequence generation              | 8a      | Method used to generate the random allocation sequence                                                                                                                                      | 7                   |
|                                  | 8b      | Type of randomization; details of any restriction (such as blocking and block size)                                                                                                         | 7                   |
| Allocation concealment mechanism | 9       | Mechanism used to implement the random allocation sequence (such as sequentially numbered containers), describing any steps taken to conceal the sequence until interventions were assigned | 7                   |
| Implementation                   | 10      | Who generated the random allocation sequence, who enrolled participants, and who assigned participants to interventions                                                                     | 18                  |
| Blinding                         | 11a     | If done, who was blinded after assignment to interventions (for example, participants, care providers, those assessing outcomes) and how                                                    | NA                  |
|                                  | 11b     | If relevant, description of the similarity of interventions                                                                                                                                 | 4                   |
| Statistical methods              | 12a     | Statistical methods used to compare groups for primary and secondary outcomes                                                                                                               | 8-9                 |
|                                  | 12b     | Methods for additional analyses, such as subgroup analyses and adjusted analyses                                                                                                            | 8-9                 |
| <b>Results</b>                   |         |                                                                                                                                                                                             |                     |

|                                                      |     |                                                                                                                                                   |        |
|------------------------------------------------------|-----|---------------------------------------------------------------------------------------------------------------------------------------------------|--------|
| Participant flow (a diagram is strongly recommended) | 13a | For each group, the numbers of participants who were randomly assigned, received intended treatment, and were analyzed for the primary outcome    | 10     |
|                                                      | 13b | For each group, losses and exclusions after randomization, together with reasons                                                                  | 10     |
| Recruitment                                          | 14a | Dates defining the periods of recruitment and follow-up                                                                                           | 6      |
|                                                      | 14b | Why the trial ended or was stopped                                                                                                                | NA     |
| Baseline data                                        | 15  | A table showing baseline demographic and clinical characteristics for each group                                                                  | 19     |
| Numbers analyzed                                     | 16  | For each group, number of participants (denominator) included in each analysis and whether the analysis was by original assigned groups           | 8 & 10 |
| Outcomes and estimation                              | 17a | For each primary and secondary outcome, results for each group, and the estimated effect size and its precision (such as 95% confidence interval) | 10-12  |
|                                                      | 17b | For binary outcomes, presentation of both absolute and relative effect sizes is recommended                                                       | -      |
| Ancillary analyses                                   | 18  | Results of any other analyses performed, including subgroup analyses and adjusted analyses, distinguishing pre-specified from exploratory         | 10-12  |
| Harms                                                | 19  | All important harms or unintended effects in each group (for specific guidance see CONSORT for harms)                                             | 20     |
| <b>Discussion</b>                                    |     |                                                                                                                                                   |        |
| Limitations                                          | 20  | Trial limitations, addressing sources of potential bias, imprecision, and, if relevant, multiplicity of analyses                                  | 16     |
| Generalizability                                     | 21  | Generalizability (external validity, applicability) of the trial findings                                                                         | 13-17  |
| Interpretation                                       | 22  | Interpretation consistent with results, balancing benefits and harms, and considering other relevant evidence                                     | 13-17  |
| <b>Other information</b>                             |     |                                                                                                                                                   |        |
| Registration                                         | 23  | Registration number and name of trial registry                                                                                                    | 6      |
| Protocol                                             | 24  | Where the full trial protocol can be accessed, if available                                                                                       | NA     |
| Funding                                              | 25  | Sources of funding and other support (such as supply of drugs), role of funders                                                                   | 18     |

**Supplemental Table 2:** Effect of sodium restriction and diuretics on day and night systolic blood pressure (SBP), diastolic blood pressure (DBP) and mean arterial pressure (MAP).

|                  | Na <sup>+</sup><br>restriction | <i>P</i> for<br>treatment<br>effect | Distal<br>diuretics | <i>P</i> for<br>treatment<br>effect | <i>P</i> for<br>interaction |
|------------------|--------------------------------|-------------------------------------|---------------------|-------------------------------------|-----------------------------|
| Day SBP (mmHg)   | -6 ± 2                         | <i>P</i> < 0.01                     | -14 ± 2             | <i>P</i> < 0.01                     | <i>P</i> < 0.01             |
| Day DBP (mmHg)   | -2 ± 1                         | <i>P</i> = 0.2                      | -5 ± 1              | <i>P</i> < 0.01                     | <i>P</i> = 0.09             |
| Day MAP (mmHg)   | -4 ± 1                         | <i>P</i> < 0.05                     | -8 ± 1              | <i>P</i> < 0.01                     | <i>P</i> < 0.05             |
| Night SBP (mmHg) | -3 ± 2                         | <i>P</i> = 0.4                      | -14 ± 2             | <i>P</i> < 0.01                     | <i>P</i> < 0.01             |
| Night DBP (mmHg) | 0 ± 2                          | <i>P</i> = 1                        | -5 ± 2              | <i>P</i> < 0.01                     | <i>P</i> < 0.05             |
| Night MAP (mmHg) | -1 ± 2                         | <i>P</i> = 0.8                      | -8 ± 2              | <i>P</i> < 0.01                     | <i>P</i> < 0.01             |
| SBP dipping (%)  | +2.1 ± 3.4                     | <i>P</i> = 1                        | +1.4 ± 3.4          | <i>P</i> = 1                        | <i>P</i> = 1                |

Treatment effect and treatment interaction were analyzed by two-way repeated measures ANOVA that included treatment order as between-subject factor.

DBP, diastolic blood pressure; MAP, mean arterial pressure; Na<sup>+</sup>, sodium; SBP, systolic blood pressure.

**Supplemental Figure 1:** Consolidated Standards of Reporting Trials (CONSORT) diagram.

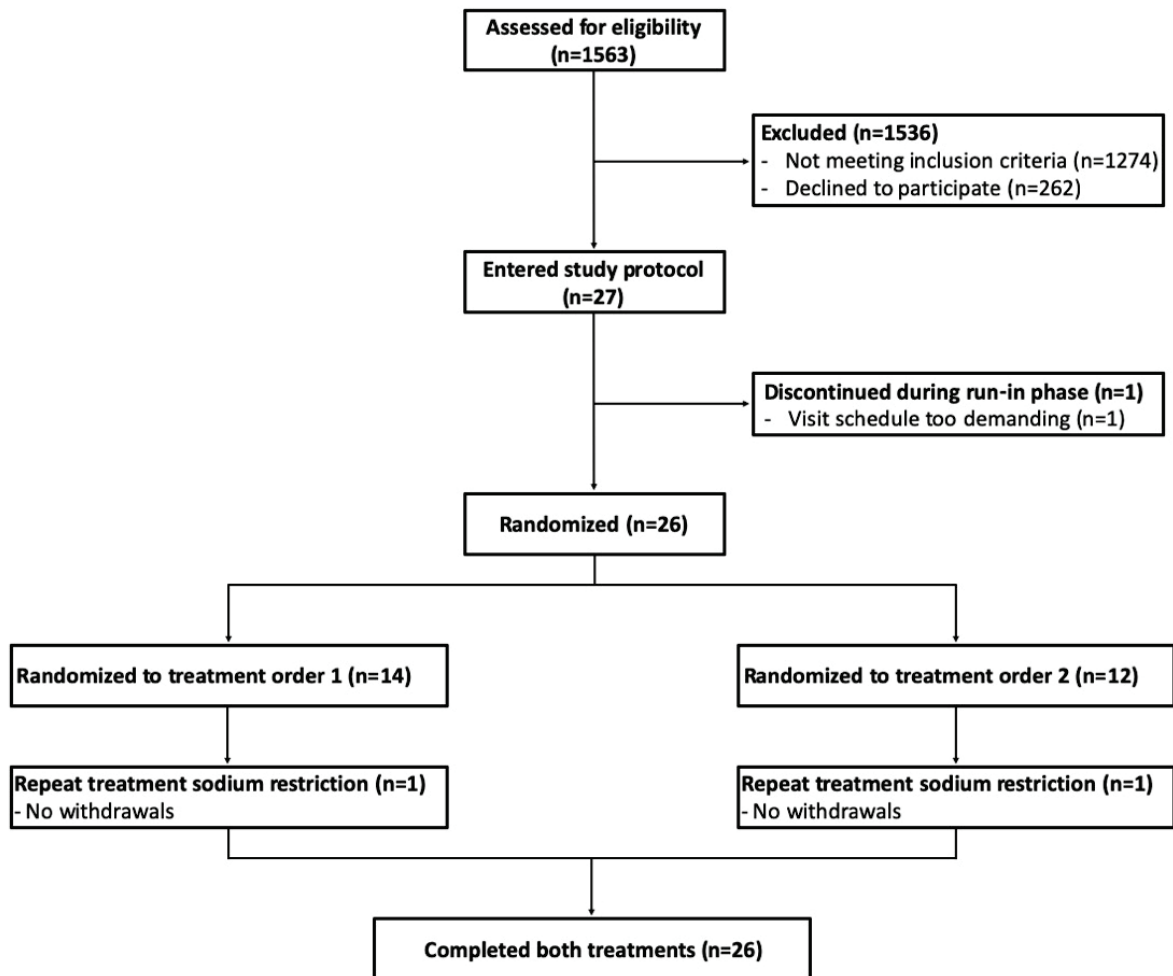

**Legend:** Treatment order 1: first treatment period diuretics, second treatment period dietary sodium restriction. Treatment order 2: first treatment period sodium restriction, second treatment period diuretics.

**Supplemental Figure 2:** Effect of sodium ( $\text{Na}^+$ ) restriction and diuretics on creatinine clearance.

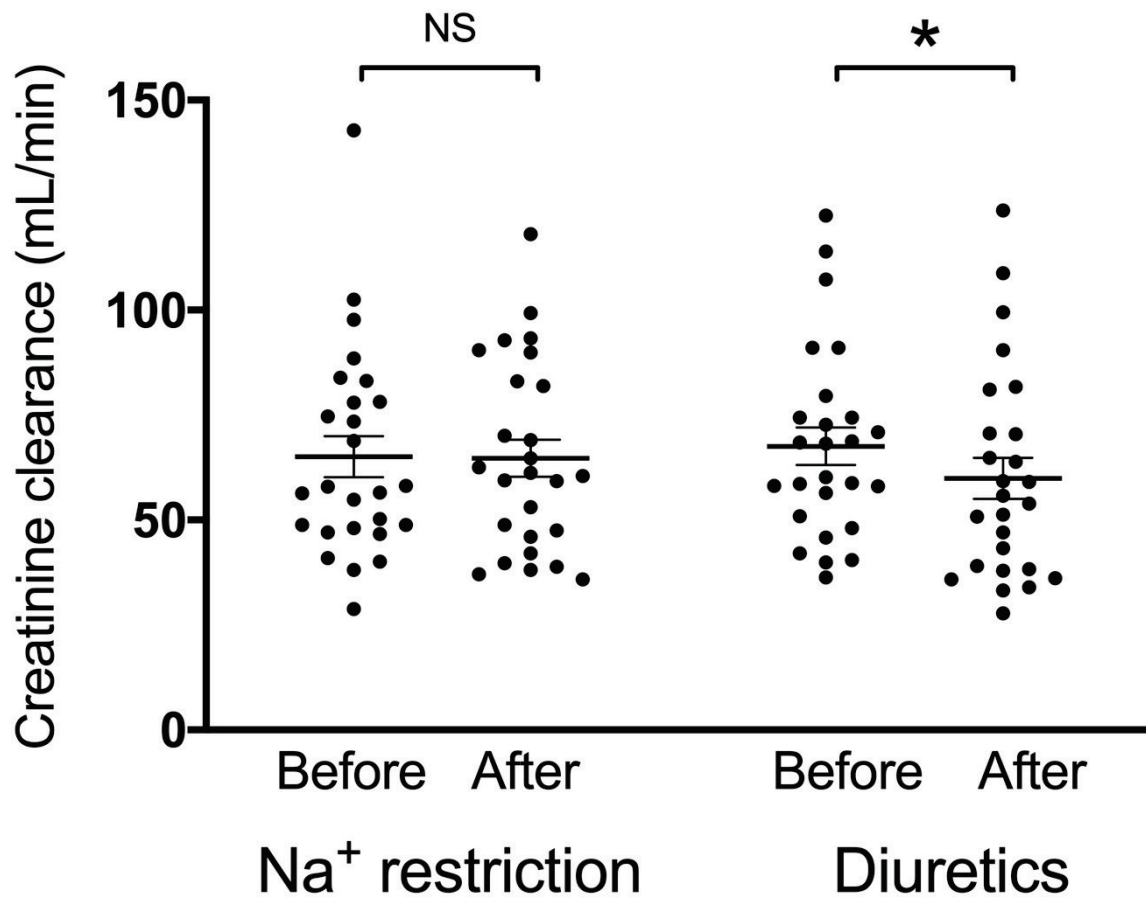

**Legend:** Data are normally distributed and two-way repeated measures ANOVA was used for analysis. \*  $P < 0.05$  for difference before versus after treatment.

**References**

1. van Kesteren CA, Saris JJ, Dekkers DH, Lamers JM, Saxena PR, Schalekamp MA and Danser AH. Cultured neonatal rat cardiac myocytes and fibroblasts do not synthesize renin or angiotensinogen: evidence for stretch-induced cardiomyocyte hypertrophy independent of angiotensin II. *Cardiovasc Res.* 1999;43:148-56.
2. van den Heuvel M, Batenburg WW, Jainandunsing S, Garrelds IM, van Gool JM, Feelders RA, van den Meiracker AH and Danser AH. Urinary renin, but not angiotensinogen or aldosterone, reflects the renal renin-angiotensin-aldosterone system activity and the efficacy of renin-angiotensin-aldosterone system blockade in the kidney. *J Hypertens.* 2011;29:2147-55.
3. Roksnoer LC, Verdonk K, Garrelds IM, van Gool JM, Zietse R, Hoorn EJ and Danser AH. Methodologic issues in the measurement of urinary renin. *Clin J Am Soc Nephrol.* 2014;9:1163-7.
4. Danser AH, Koning MM, Admiraal PJ, Derkx FH, Verdouw PD and Schalekamp MA. Metabolism of angiotensin I by different tissues in the intact animal. *Am J Physiol.* 1992;263:H418-28.
